# Supplementary material
Source: PubMed Central journal article supplement (PMC7343609)

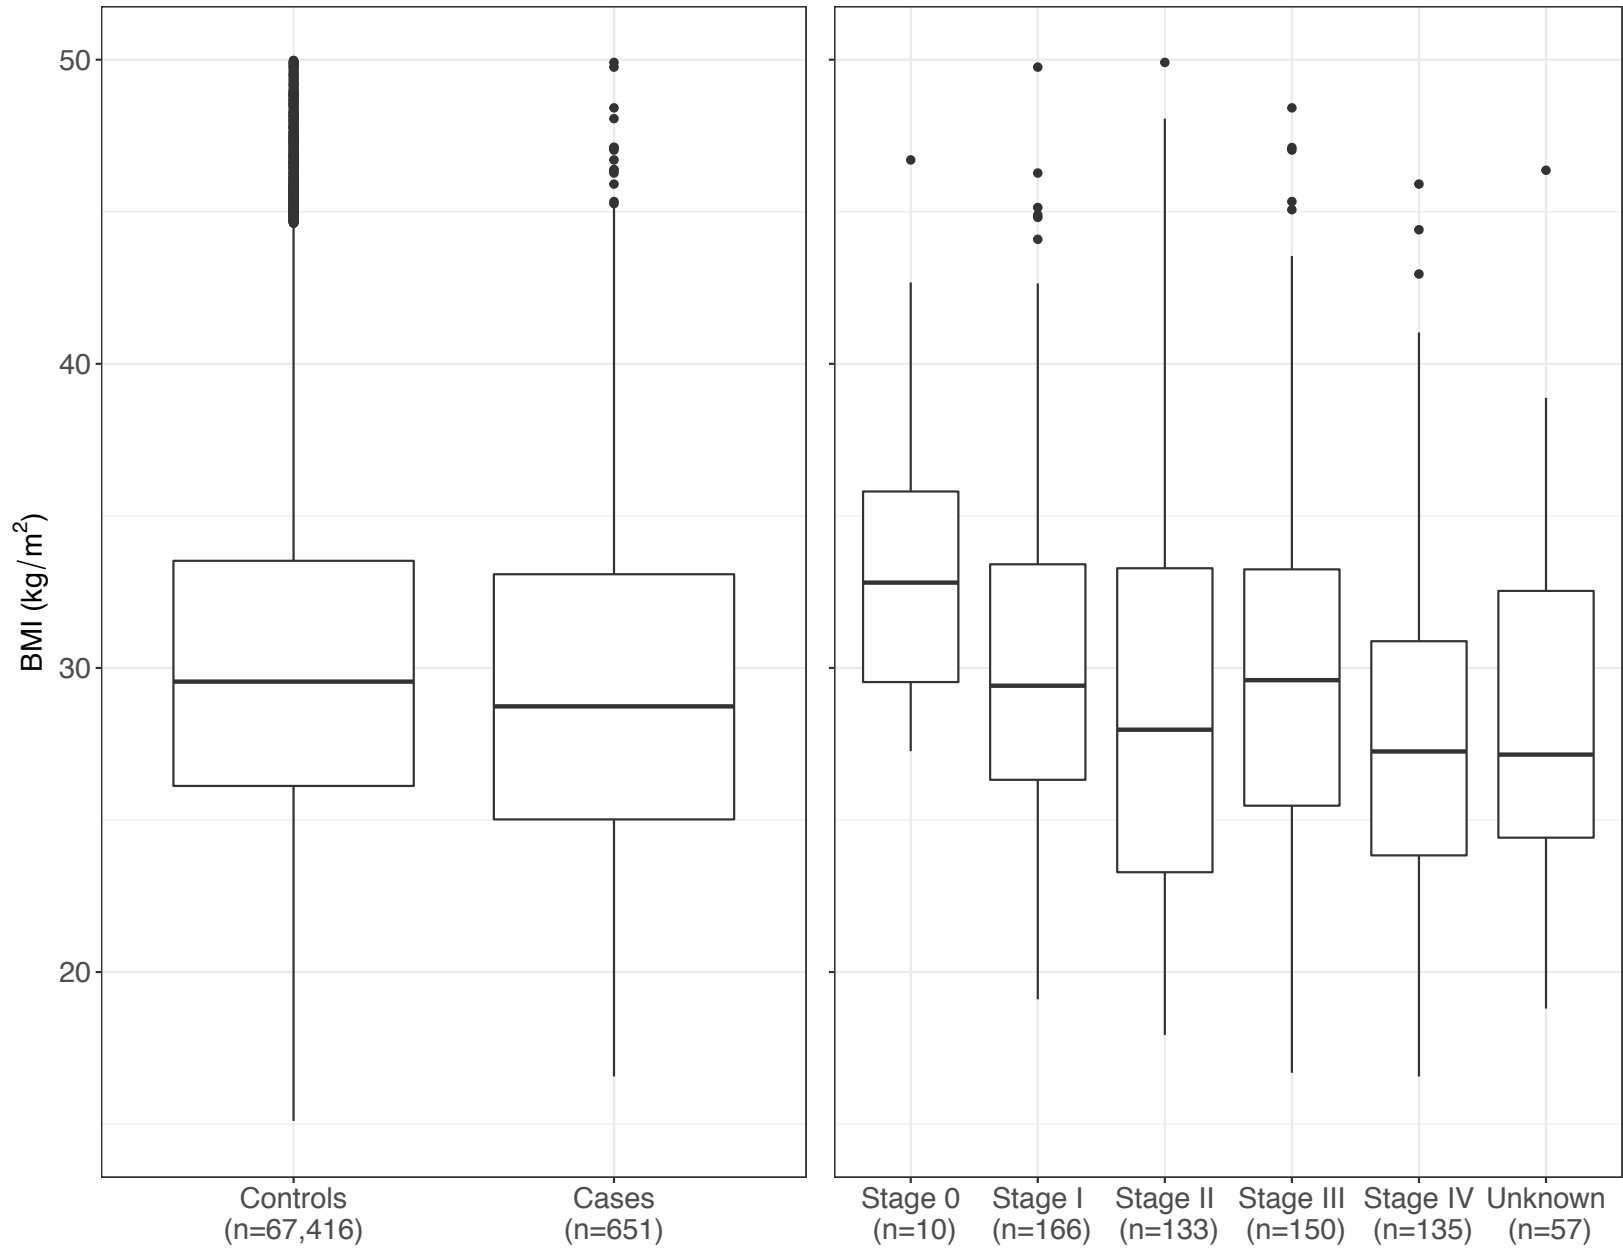

Supplement: NIHMS1549342-supplement-3.pdf [file NIHMS1549342-supplement-3.pdf]

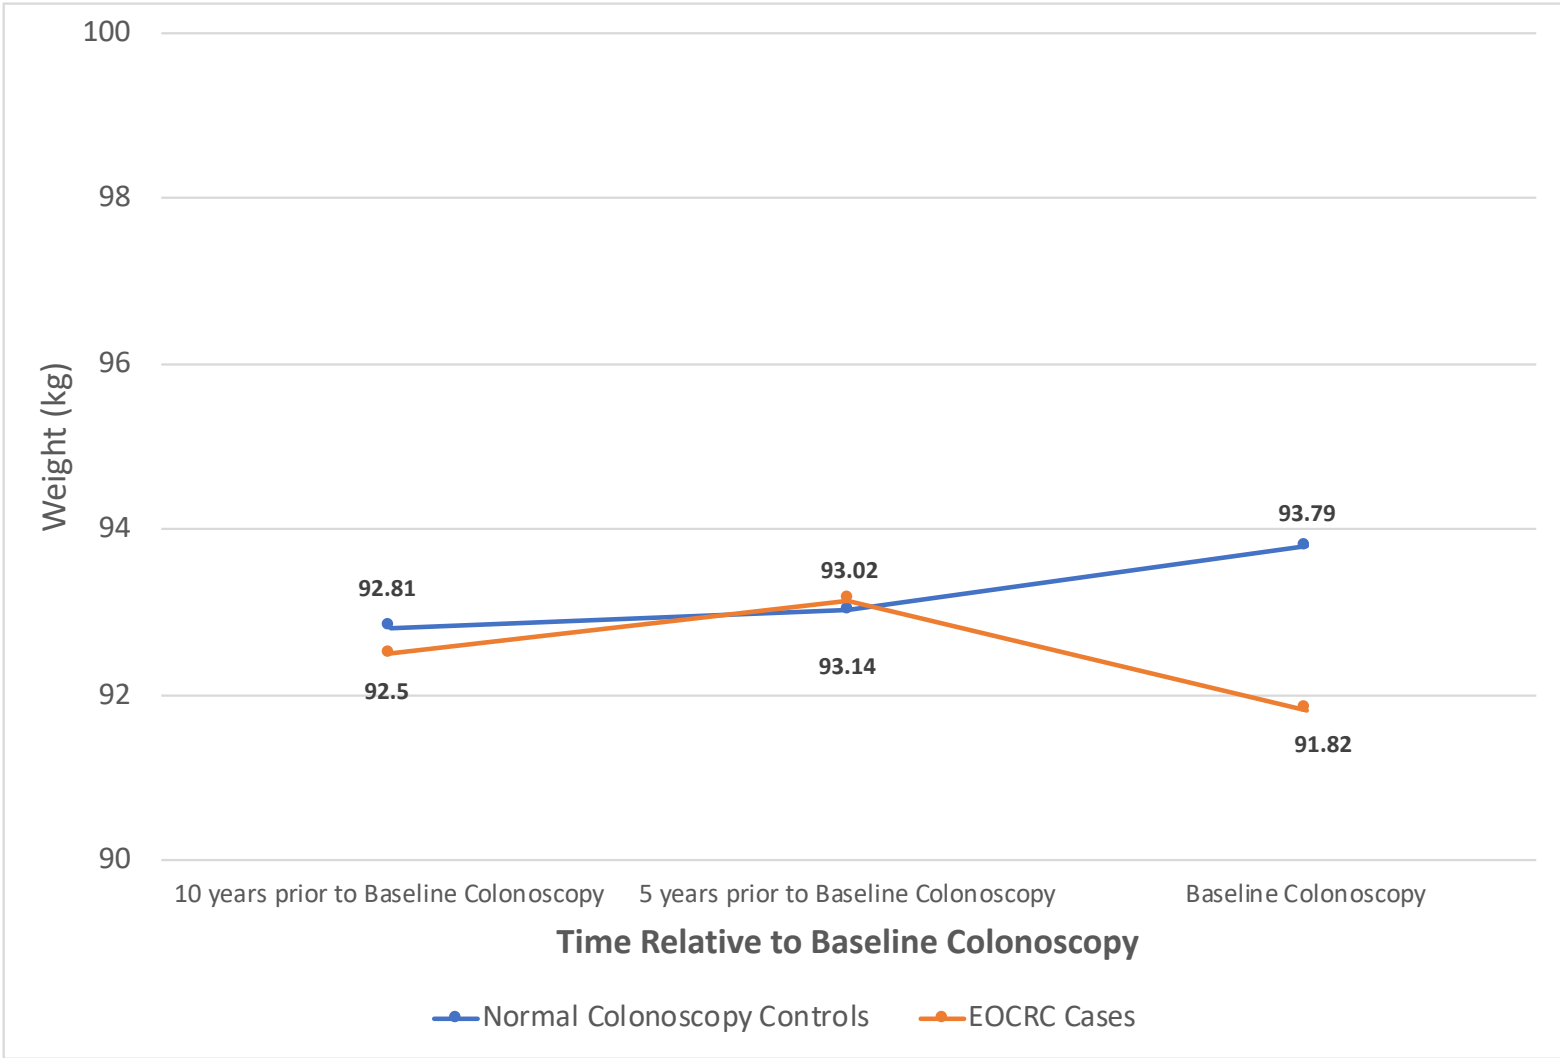

Supplement: NIHMS1549342-supplement-4.pdf [file NIHMS1549342-supplement-4.pdf]
